# Supplementary material for: Exhaled-Breath Testing Using an Electronic Nose during Spinal Cord Stimulation in Patients with Failed Back Surgery Syndrome: An Experimental Pilot Study
Source: MDPI journal article supplement (doi:10.3390/jcm10132921), 2021-06-29
Supplement: s1 [file s1]

## Supplementary Materials

Supplementary Table S1. Patient characteristics.

| Sex | Age | Type of SCS | Surgical indication    | MQS total score | MQS NSAID+acetaminophen subscore | MQS relaxant subscore | MQS neuropahtic mood agents subscores | MQS benzodiazepines subscore | MQS opioids subscore | Comorbidities  |
|-----|-----|-------------|------------------------|-----------------|----------------------------------|-----------------------|---------------------------------------|------------------------------|----------------------|----------------|
| M   | 59  | conv        | lumbar disc herniation | 3.9             | 0                                | 0                     | 0                                     | 3.9                          | 0                    | cardiovascular |
| M   | 67  | conv        | lumbar disc herniation | 5.8             | 0                                | 0                     | 1.9                                   | 3.9                          | 0                    | infection      |
| M   | 55  | conv        | spinal tumor resection | 17.3            | 0                                | 0                     | 13.9                                  | 0                            | 3.4                  |                |
| F   | 53  | conv        | lumbar disc herniation | 0               | 0                                | 0                     | 0                                     | 0                            | 0                    |                |
| F   | 67  | HD          | lumbar disc herniation | 15.3            | 0                                | 0                     | 8.5                                   | 0                            | 6.8                  | fibromyalgia   |
| M   | 42  | conv        | lumbar fusion          | 11              | 0                                | 0                     | 7.6                                   | 0                            | 3.4                  | cardiovascular |
| F   | 75  | conv        | spinal decompression   | 6.8             | 6.8                              | 0                     | 0                                     | 0                            | 0                    |                |

|   |    |       |                               |      |     |   |     |      |      |                |
|---|----|-------|-------------------------------|------|-----|---|-----|------|------|----------------|
| F | 60 | conv  | spinal tumor resection        | 17   | 3.4 | 0 | 0   | 0    | 13.6 |                |
| M | 44 | conv  | cervical disc herniation      | 11.6 | 0   | 0 | 8.2 | 0    | 3.4  |                |
| F | 70 | conv  | lumbar disc herniation        | 6.2  | 3.4 | 0 | 2.8 | 0    | 0    | cardiovascular |
| M | 48 | conv  | lumbar fusion                 | 14.1 | 0   | 0 | 0   | 3.9  | 10.2 |                |
| M | 42 | conv  | lumbar fusion                 | 18.9 | 0   | 0 | 1.9 | 0    | 17   |                |
| F | 53 | conv  | lumbar disc herniation        | 32.2 | 3.4 | 0 | 4   | 7.8  | 17   | DM             |
| F | 56 | conv  | spinal decompression          | 6.3  | 0   | 0 | 6.3 | 0    | 0    | DM             |
| M | 51 | conv  | lumbar fusion +<br>corpectomy | 6.3  | 0   | 0 | 6.3 | 0    | 0    | DM             |
| F | 55 | conv  | lumbar fusion                 | 3.4  | 0   | 0 | 0   | 0    | 3.4  |                |
| M | 36 | HF-10 | lumbar fusion                 | 17   | 0   | 0 | 0   | 0    | 17   |                |
| M | 53 | HF-10 | lumbar fusion                 | 6.2  | 0   | 0 | 2.3 | 3.9  | 0    |                |
| F | 49 | HF-10 | lumbar fusion                 | 13.6 | 3.4 | 0 | 0   | 0    | 10.2 |                |
| M | 62 | HF-10 | spinal decompression          | 7.3  | 0   | 0 | 0   | 3.9  | 3.4  | sleep disorder |
| M | 50 | conv  | lumbar fusion                 | 15.6 | 0   | 0 | 0   | 15.6 | 0    |                |

|   |    |      |                        |      |      |   |      |      |     |                |
|---|----|------|------------------------|------|------|---|------|------|-----|----------------|
| M | 73 | conv | lumbar disc herniation | 6.8  | 6.8  | 0 | 0    | 0    | 0   | cardiovascular |
| F | 51 | DTM  | lumbar disc herniation | 7.3  | 3.4  | 0 | 0    | 3.9  | 0   |                |
| M | 61 | conv | lumbar fusion          | 3.4  | 0    | 0 | 0    | 0    | 3.4 | DM             |
| F | 72 | conv | lumbar fusion          | 17.4 | 0    | 0 | 2.3  | 11.7 | 3.4 |                |
| F | 46 | conv | lumbar disc herniation | 27.5 | 13.6 | 0 | 13.9 | 0    | 0   |                |

Abbreviations. Conv: standard spinal cord stimulation, DM: diabetes mellitus, DTM : differential target multiplexed spinal cord stimulation, F: female, HD : high-dose spinal cord stimulation, HF-10 : high frequency spinal cord stimulation at 10 kHz, ID: patient identification, M: male, MQS: medication quantification scale, P: patient.
